# Supplementary material for: The distribution pattern of genetic variation in the transcript isoforms of the alternatively spliced protein-coding genes in the human genome
Source: Royal Society of Chemistry journal article supplement (doi:10.1039/c5mb00132c), 2015-03-23
Supplement: c5mb00132c4.pdf [file c5mb00132c4.pdf]

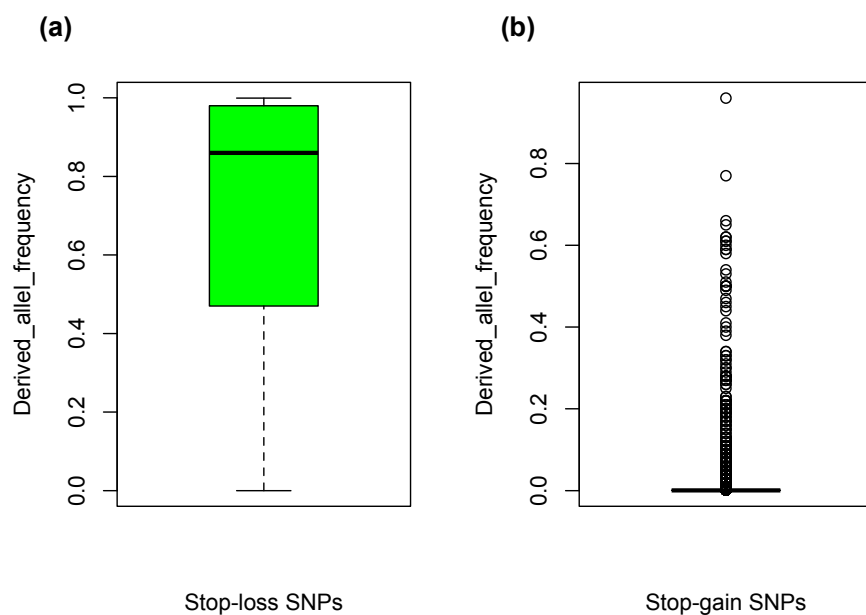

**S1. Derived allele frequency of Stop-loss and Stop-gain SNPs.** (a): The derived allele frequency of stop-loss SNPs in the 1000 Human Genome Project (median frequency is 0.83). (b): The derived allele frequency of stop-gain SNPs in the 1000 Human Genome Project (median frequency is  $5 \times 10^{-4}$ ). In summary, the derived allele frequencies of stop-gain SNPs are remarkably lower than stop-loss SNPs.

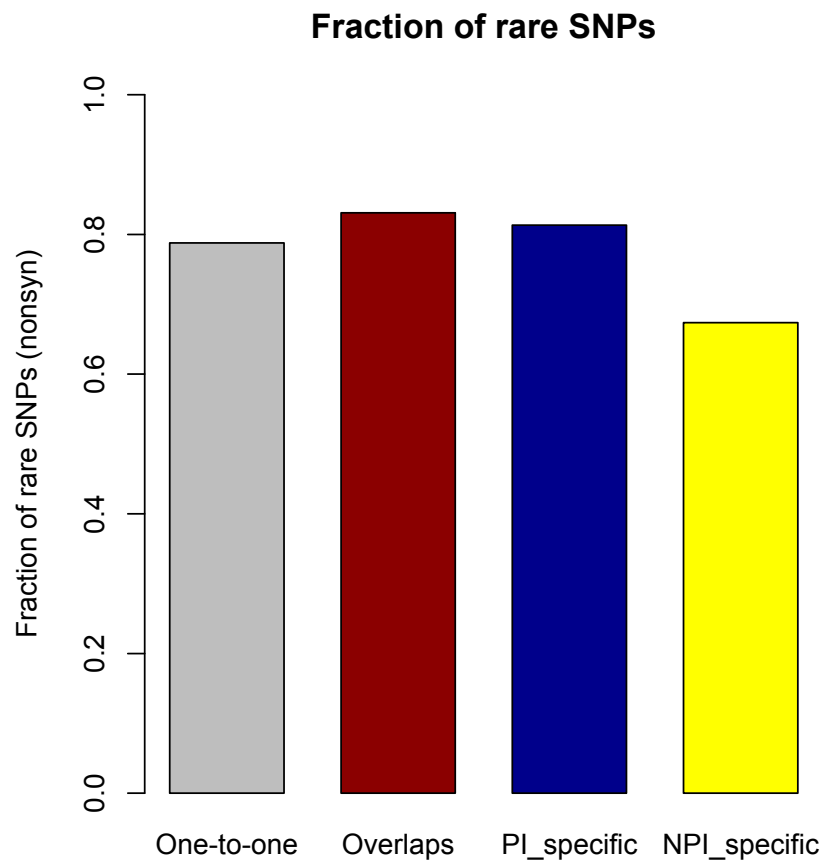

**S2. Fraction of rare non-synonymous SNPs in different isoform coding categories** Vertical axis represents the proportion of rare (DAF<0.5%) non-synonymous SNPs to total non-synonymous SNPs in different coding categories. The one-to-one means the protein-coding gene has only one protein-coding transcript. The proportion of rare non-synonymous in one-to-one as expected distribution, the fraction of rare non-synonymous SNPs in other coding categories are significant different (p-value<2.2e-16, binomial test).

(a)

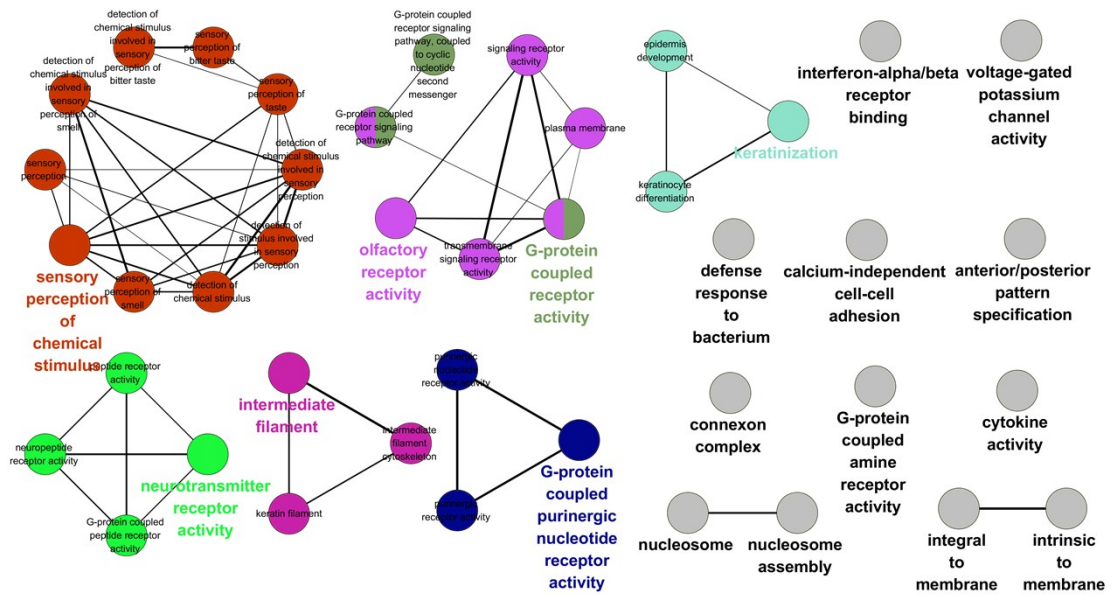

(b)

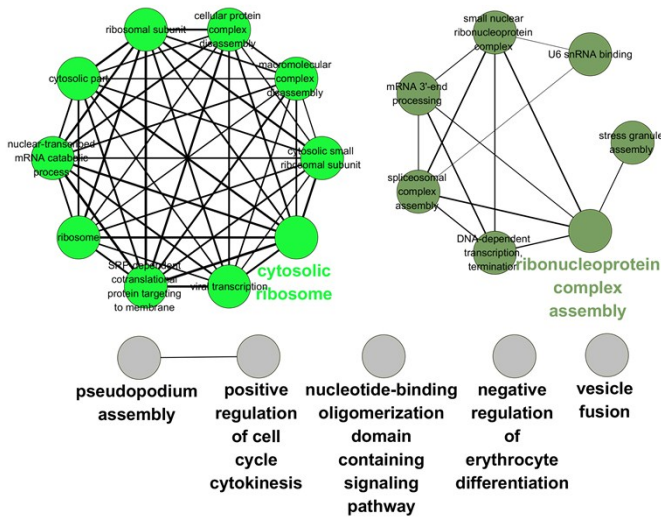

**S3. GO enrichment of two gene sets.** (a): Non-synonymous SNPs that were solely present in PI-specific regions. (b): Non-synonymous SNPs that were solely present in NPI-specific regions. The enrichment result of PI-specific non-synonymous SNPs gene set was largely overlapped with the result of the gene set with stop-gain SNPs.

**Table S1. The NMD-targeting prediction based on 50-55-nucleotide rule**

|                   | Positive on NMD prediction | Negative on NMD prediction | Total |
|-------------------|----------------------------|----------------------------|-------|
| PI-specific SNPs  | 759                        | 171                        | 930   |
| NPI-specific SNPs | 345                        | 129                        | 474   |

The number of stop-gain SNPs predicted as NMD positive and negative.

**Table S2. The number of number of times that randomised values is less than the observed value at substitution dataset.**

| Number of gene sampled (percent of the gene pool) | The number of random values less than the observed value at non-synonymous dataset | The number of random values less than the observed value at stop-gain dataset |
|---------------------------------------------------|------------------------------------------------------------------------------------|-------------------------------------------------------------------------------|
| 5%                                                | 702                                                                                | 998                                                                           |
| 10%                                               | 783                                                                                | 1000                                                                          |
| 15%                                               | 822                                                                                | 1000                                                                          |
| 20%                                               | 867                                                                                | 1000                                                                          |
| 25%                                               | 901                                                                                | 1000                                                                          |
| 30%                                               | 925                                                                                | 1000                                                                          |

It means that in 1000 random experiments, how many times the ratio of NPI-specific SNPs/all SNPs was less than the observed ratio in sampled gene set.

**Table S3. The number of PI-specific, NPI-specific, and overlapping variations with different types of substitutions in multi-transcript genes.**

|              | Frame_shift_Indel | Stop_gain/loss | Non_Synonymous | Synonymous | Length(bp) |
|--------------|-------------------|----------------|----------------|------------|------------|
| Overlaps     | 289               | 2,786          | 161,160        | 118,522    | 19,314,235 |
| PI_specific  | 108               | 937            | 48,876         | 33,449     | 5,654,482  |
| NPI_specific | 190               | 476            | 11,831         | 5,533      | 1,275,329  |

**Table S4. The number of PI-specific, NPI-specific, and overlapping SNPs associated with different types of substitutions at different derived allele frequencies.**

|              | Stop gain |     |        | Non-synonymous |        |        | Synonymous |        |        | Length (bp) |
|--------------|-----------|-----|--------|----------------|--------|--------|------------|--------|--------|-------------|
|              | Rare      | Low | Common | Rare           | Low    | Common | Rare       | Low    | Common |             |
| Overlaps     | 2,480     | 129 | 41     | 130,302        | 17,075 | 9,449  | 84,804     | 17,595 | 13,131 | 19,314,235  |
| NPI-specific | 320       | 83  | 42     | 7,646          | 2,174  | 1,531  | 3,534      | 1,018  | 787    | 1,275,329   |
| PI-specific  | 812       | 57  | 22     | 38,179         | 5,502  | 3,261  | 23,282     | 5,118  | 3,848  | 5,654,482   |
